# Supplementary material
Source: PubMed Central journal article supplement (PMC10124294)
Supplement: NIHMS1887026-supplement-Supplemental_material.pdf [file NIHMS1887026-supplement-Supplemental_material.pdf]

Supplemental Table 1. Coping strategies-results of principal components analysis followed by Oblimin rotation: factor loadings

|                          |                                                                                   | 1     | 2     | 3     | 4     | 5     | 6     | 7     | 8     | 9     |
|--------------------------|-----------------------------------------------------------------------------------|-------|-------|-------|-------|-------|-------|-------|-------|-------|
| % total variance         |                                                                                   | 22.1  | 10.0  | 7.34  | 7.20  | 6.35  | 5.27  | 4.79  | 3.96  | 3.90  |
| Cronbach's $\alpha$ Item |                                                                                   | .85   | .93   | .91   | .76   | .64   | .82   | .60   | .76   | .57   |
| Mean (time 2)            |                                                                                   | 1.65  | .17   | .71   | 1.39  | .23   | 1.41  | .53   | 2.72  | .76   |
| (SD)                     |                                                                                   | (.85) | (.39) | (.81) | (.84) | (.58) | (.85) | (.49) | (.48) | (.56) |
| Active coping            | I've been concentrating my efforts on doing something about the situation I'm in. | .84   |       |       |       |       |       |       |       |       |
| Planning                 | I've been trying to come up with a strategy about what to do                      | .79   |       |       |       |       |       |       |       |       |
| Planning                 | I've been thinking hard about what steps to take.                                 | .78   |       |       |       |       |       |       |       |       |
| Active coping            | I've been taking action to try to make the situation better                       | .74   |       |       |       |       |       |       |       |       |
| Alcohol/<br>Drug use     | I've been using alcohol and other drugs to help me get through it                 |       | .96   |       |       |       |       |       |       |       |
| Alcohol/<br>Drug use     | I've been using alcohol or other drugs to make myself feel better                 |       | .90   |       |       |       |       |       |       |       |
| Humor                    | I've been making fun of the situation                                             |       |       | .95   |       |       |       |       |       |       |
| Humor                    | I've been making jokes about it.                                                  |       |       | .92   |       |       |       |       |       |       |
| Religion                 | I've been praying or meditating.                                                  |       |       |       | .90   |       |       |       |       |       |
| Religion                 | I've been trying to find comfort in my religion or spiritual beliefs.             |       |       |       | .89   |       |       |       |       |       |

---

|                                      |                                                                                 |     |      |
|--------------------------------------|---------------------------------------------------------------------------------|-----|------|
| Positive reinterpretation and growth | I've been looking for something good in what is happening                       | .47 |      |
| Positive reinterpretation and growth | I've been trying to see it in a different light, to make it seem more positive. | .41 |      |
| Denial                               | I've been saying to myself "this isn't real."                                   | .80 |      |
| Denial                               | I've been refusing to believe that it has happened.                             | .80 |      |
| Seeking of emotional support         | I've been getting emotional support from others.                                |     | -.82 |
| Using instrumental support           | I've been getting help and advice from other people                             |     | -.72 |
| Seeking of emotional support         | I've been getting comfort and understanding from someone.                       |     | -.69 |
| Using instrumental support           | I've been trying to get advice or help from other people about what to do.      |     | -.41 |
| Focus on and venting of emotions     | I've been expressing my negative feelings.                                      |     | .36  |
| Self-blame                           | I've been criticizing myself                                                    |     | .85  |
| Self-blame                           | I've been blaming myself for things that happened.                              |     | .68  |
| Focus on and venting of emotions     | I've been saying things to let my unpleasant feelings escape.                   |     | .46  |
| Acceptance                           | I've been accepting the reality of the fact that it has happened.               |     | -.75 |
| Acceptance                           | I've been learning to live with it.                                             |     | -.73 |

---

---

|                          |                                                                                                                                     |     |
|--------------------------|-------------------------------------------------------------------------------------------------------------------------------------|-----|
| Behavioral disengagement | I've been giving up trying to deal with it.                                                                                         | .83 |
| Behavioral disengagement | I've been giving up the attempt to cope.                                                                                            | .50 |
| Mental disengagement     | I've been doing something to think about it less, such as going to movies, watching TV, reading, daydreaming, sleeping or shopping. | .49 |
| Mental disengagement     | I've been turning to work or other activities to take my mind off things.                                                           | .42 |

---

Supplemental table 2. Pearson correlates among covariates and outcomes of interest.

|                                   | 1      | 2      | 3      | 4      | 5     | 6    | 7     | 8      | 9   | 10 |
|-----------------------------------|--------|--------|--------|--------|-------|------|-------|--------|-----|----|
| 1. PSQI total score               |        |        |        |        |       |      |       |        |     |    |
| 2. CESD total score               | .50**  |        |        |        |       |      |       |        |     |    |
| 3. Global mental score (MCS)      | -.45** | -.74** |        |        |       |      |       |        |     |    |
| 4. Global physical score (PCS)    | -.27** | -.33** | .43**  |        |       |      |       |        |     |    |
| 5. Overall perceived health       | .23*   | .29**  | -.35** | -.75** |       |      |       |        |     |    |
| 6. Shift work history             | .19*   | .12    | -.08   | -.09   | .11   |      |       |        |     |    |
| 7. Days between time 1 and time 2 | .10    | .05    | -.04   | -.17   | .25** | -.04 |       |        |     |    |
| 8. Sex                            | .33**  | .18    | -.15   | .004   | -.06  | -.03 | .25** |        |     |    |
| 9. Age                            | -.32** | -.26** | .25**  | .14    | -.07  | -.08 | -.07  | -.28** |     |    |
| 10. Subjective social status      | .18    | .24**  | -.21*  | -.33** | .44** | .18  | .14   | .26**  | .05 |    |

Note.  $p < .05$ , \*\*  $p < .01$
